# Supplementary material
Source: PubMed Central journal article supplement (PMC6223027)
Supplement: NIHMS990618-supplement-Online_Data.pdf [file NIHMS990618-supplement-Online_Data.pdf]

**Drift Tube IMS Measured Collision cross sections ( $^{DT}CCS_{N_2}$ ) for Xenobiotics**

**Polycyclic Aromatic Hydrocarbons (PAHs)**

| Compounds                   | Abbreviation | CAS       | Formula  | Exact Mass | [M+H] <sup>+</sup> | Avg CCS | RSD% | [M] <sup>+</sup> | Avg CCS | RSD% |
|-----------------------------|--------------|-----------|----------|------------|--------------------|---------|------|------------------|---------|------|
| Naphthalene                 | NAY          | 91-20-3   | C10H8    | 128.0626   | 129.0704           | 120.28  | 0.32 | 128.0626         | 118.84  | 0.18 |
| 1-methylnaphthalene         | 1MA          | 90-12-0   | C11H10   | 142.0782   | 143.0861           | 125.20  | 0.14 | 142.0782         | 123.49  | 0.14 |
| 2-methylnaphthalene         | 2MT          | 91-57-6   | C11H10   | 142.0782   | 143.0861           | 124.57  | 0.11 | 142.0782         | 123.19  | 0.04 |
| Acenaphthylene              | ALE          | 208-96-8  | C12H8    | 152.0626   | 153.0704           | 125.71  | 0.10 | 152.0626         | 124.80  | 0.04 |
| Acenaphthene                | ATC          | 83-32-9   | C12H10   | 154.0782   | 155.0861           | N/A     | N/A  | 154.0782         | 128.5   | 0.11 |
| 1, 2-Dimethylnaphthalene    | 1DL          | 573-98-8  | C12H12   | 156.0939   | 157.1017           | 130.93  | 0.35 | 156.0939         | 128.35  | 0.15 |
| 1,6-Dimethylnaphthalene     | 16D          | 575-43-9  | C12H12   | 156.0939   | 157.1017           | 130.13  | 0.19 | 156.0939         | 127.82  | 0.10 |
| 2, 7-Dimethylnaphthalene    | 27D          | 582-16-1  | C12H12   | 156.0939   | 157.1017           | 131.00  | 0.11 | 156.0939         | N/A     | N/A  |
| Fluorene                    | FOR          | 86-73-7   | C13H10   | 166.0782   | 167.0861           | N/A     | N/A  | 166.0782         | 130.9   | 0.12 |
| 2,3,4- Trimethylnaphthalene | TMN          | 2245-38-7 | C13H14   | 170.1095   | 171.1174           | N/A     | N/A  | 170.1095         | 134.67  | 0.09 |
| Anthracene                  | ACO          | 120-12-7  | C14H10   | 178.0782   | 179.0861           | N/A     | N/A  | 178.0782         | 133.1   | 0.14 |
| Perinaphthenon              | PEN          | 548-39-0  | C13H8O   | 180.0575   | 181.0653           | 134.59  | 0.55 | 180.0575         | N/A     | N/A  |
| Acenaphthenequinone         | AQL          | 82-86-0   | C12H6O2  | 182.0368   | 183.0446           | 144.02  | 0.45 | 182.0368         | N/A     | N/A  |
| Dibenzothiophene            | DBT          | 132-65-0  | C12 H8 S | 184.0347   | 185.0425           | N/A     | N/A  | 184.0347         | 132.30  | 0.08 |
| 1-Methylphenanthrene        | 1ME          | 832-69-9  | C15 H12  | 192.0939   | 193.1017           | N/A     | N/A  | 192.0939         | 137.83  | 0.08 |
| 2-Methylanthracene          | 2ME          | 613-12-7  | C15H12   | 192.0939   | 193.1017           | 138.61  | 0.30 | 192.0939         | 137.27  | 0.28 |
| 9-Methylanthracene          | 9ME          | 779-02-2  | C15H12   | 192.0939   | 193.1017           | N/A     | N/A  | 192.0939         | 136.43  | 0.06 |
| Pyrene                      | PE5          | 129-00-0  | C16H10   | 202.0782   | 203.0861           | 137.97  | 0.09 | 202.0782         | 137.50  | 0.19 |
| Fluoranthene                | FA           | 206-44-0  | C16H10   | 202.0783   | 203.0861           | 138.84  | 0.00 | 202.0783         | 138.34  | 0.06 |
| 2, 3-Dimethylanthracene     | 23D          | 613-06-9  | C16H14   | 206.1095   | 207.1174           | 146.15  | 0.09 | 206.1095         | N/A     | N/A  |
| 3,6-Dimethylphenanthrene    | 36T          | 1576-67-6 | C16H14   | 206.1095   | 207.1174           | 145.58  | 0.06 | 206.1095         | 144.44  | 0.09 |
| Anthraquinone               | AQU          | 84-65-1   | C14H8O2  | 208.0524   | 209.0603           | 141.89  | 0.13 | 208.0524         | N/A     | N/A  |
| Triphenylene                | TPE          | 127-59-4  | C18H12   | 228.0939   | 229.1017           | N/A     | N/A  | 228.0939         | 144.81  | 0.03 |
| Benzanthrone                | BHR          | 82-05-3   | C17H10O  | 230.0732   | 231.0810           | 145.71  | 0.07 | 230.0732         | 144.61  | 0.03 |
| Pyrene-4,5 dione            | PY4          | 6217-22-7 | C16H8O2  | 232.0524   | 233.0603           | 144.30  | 0.03 | 232.0524         | N/A     | N/A  |
| Benz(j)aceanthrylene        | BJY          | 202-33-5  | C20H12   | 252.0939   | 253.1017           | 155.08  | 0.03 | 252.0939         | 152.68  | 0.08 |
| Benzo(b)fluoranthene        | BBF          | 205-99-2  | C20H12   | 252.0939   | 253.1017           | N/A     | N/A  | 252.0939         | 151.95  | 0.08 |
| Benzo(k)fluoranthene        | BKF          | 207-08-9  | C20H12   | 252.0939   | 253.1017           | 154.36  | 0.53 | 252.0939         | 152.98  | 0.17 |
| Benzo(a)Pyrene              | BAP          | 50-32-8   | C20H12   | 252.0939   | 253.1017           | 152.05  | 0.08 | 252.0939         | 151.24  | 0.11 |
| 5, 12-naphthacene quinone   | 5NA          | 1090-13-7 | C18H10O2 | 258.0681   | 259.0759           | 157.54  | 0.88 | 258.0681         | N/A     | N/A  |
| Benzo(g,h,i)perylene        | BGI          | 191-24-2  | C22H12   | 276.0939   | 277.1017           | 157.31  | 0.12 | 276.0939         | 155.83  | 0.11 |
| Indeno(1,2,3-cd)pyrene      | I12          | 193-39-5  | C22H12   | 276.0939   | 277.1017           | 159.65  | 0.56 | 276.0939         | 158.15  | 0.19 |
| Dibenzo(a,h)anthracene      | DBA          | 53-70-3   | C22 H14  | 278.1095   | 279.1174           | 164.07  | 0.04 | 278.1095         | 162.87  | 0.09 |
| Coronene                    | CON          | 191-07-1  | C24H12   | 300.0939   | 301.1017           | N/A     | N/A  | 300.0939         | 161.87  | 0.12 |
| Dibenzo(a,h)pyrene          | DAH          | 189-64-0  | C24H14   | 302.1095   | 303.1174           | 166.49  | 0.10 | 302.1095         | 165.22  | 0.08 |
| Dibenzochrysene             | DBC          | 191-68-4  | C26H16   | 302.1095   | 303.1174           | 166.69  | 0.05 | 302.1095         | 165.45  | 0.06 |

**OH-PAHs**

| Compounds                  | Abbreviation | CAS        | Formula | Exact Mass | [M-H] <sup>-</sup> | Avg CCS | RSD% |
|----------------------------|--------------|------------|---------|------------|--------------------|---------|------|
| 1, 5 dihydroxynaphthalene  | 1DH          | 83-56-7    | C10H8O2 | 160.0524   | 159.0446           | 133.63  | 0.35 |
| 2, 3-dihydroxynaphthalene  | 23A          | 92-44-4    | C10H8O2 | 160.0524   | 159.0446           | 131.73  | 0.16 |
| 2, 6- dihydroxynaphthalene | 26T          | 581-43-1   | C10H8O2 | 160.0524   | 159.0446           | 137.47  | 0.41 |
| 12-Hydroxybenzo(a)pyrene   | 1AE          | 56892-33-2 | C20H12O | 268.0888   | 267.0810           | 163.10  | 0.06 |
| 7-hydroxybenzo(a)pyrene    | 7AR          | 37994-82-4 | C20H12O | 268.0888   | 267.0810           | 163.20  | 0.00 |
| 6-Hydroxychrysene          |              | 37515-51-8 | C18H12O | 244.0888   | 243.0810           | 157.83  | 0.07 |
| 1-Hydroxypyrene            |              | 5315-79-7  | C16H10O | 218.0732   | 217.0653           | 148.47  | 0.08 |

**Polychlorinated biphenyl (PCBs)**

| Compound                                 | Abbreviation | CAS number | Formula  | Exact Mass | [M-Cl+O] <sup>-</sup> | Avg CCS | RSD % |
|------------------------------------------|--------------|------------|----------|------------|-----------------------|---------|-------|
| 2,4,4'-Trichlorobiphenyl                 | PCB-28       | 7012-37-5  | C12H7Cl3 | 255.9613   | 236.9874              | 149.67  | 0.14  |
| 2,4,5-Trichlorobiphenyl                  | PCB 29       | 15862-07-4 | C12H7Cl3 | 255.9613   | 236.9874              | 150.67  | 0.17  |
| 2,4,6-Trichlorobiphenyl                  | PCB-30       | 35693-92-6 | C12H7Cl3 | 255.9613   | 236.9874              | 150.10  | 0.12  |
| 2,2',5,5'-Tetrachlorobiphenyl            | PCB-52       | 35693-99-3 | C12H6Cl4 | 289.9224   | 270.9461              | 156.69  | 0.36  |
| 2,3',4',5'-Tetrachlorobiphenyl           | PCB-70       | 32598-11-1 | C12H6Cl4 | 289.9224   | 270.9484              | 155.63  | 0.15  |
| 3,3',4,4'-Tetrachlorobiphenyl            | PCB-77       | 32598-13-3 | C12H6Cl4 | 289.9224   | 270.9461              | 156.8   | 0.10  |
| 3,4,4',5'-Tetrachlorobiphenyl            | PCB-81       | 70362-50-4 | C12H6Cl4 | 289.9224   | 270.9484              | 158.57  | 0.07  |
| 2,2',4,5,5'-Pentachlorobiphenyl          | PCB-101      | 37680-73-2 | C12H5Cl5 | 323.8834   | 304.9061              | 162.55  | 0.07  |
| 2,2',4,5',6-Pentachlorobiphenyl          | PCB-103      | 60145-21-3 | C12H5Cl5 | 323.8834   | 304.9095              | 160.74  | 0.14  |
| 2,3,3',4,4'-Pentachlorobiphenyl          | PCB-105      | 32598-14-4 | C12H5Cl5 | 323.8834   | 304.9095              | 161.63  | 0.04  |
| 2,3,4,4',5-Pentachlorobiphenyl           | PCB-114      | 74472-37-0 | C12H5Cl5 | 323.8834   | 304.9095              | 162.13  | 0.04  |
| 3,3',4,4',5-Pentachlorobiphenyl          | PCB-126      | 57465-28-8 | C12H5Cl5 | 323.8834   | 304.9095              | 164.43  | 0.04  |
| 2,2',3,4,4',5-Hexachlorobiphenyl         | PCB-138      | 35065-28-2 | C12H4Cl6 | 357.8400   | 338.8661              | 167.98  | 0.12  |
| 2,3,3',4,4',5-Hexachlorobiphenyl         | PCB-156      | 38380-08-4 | C12H4Cl6 | 357.8444   | 338.8705              | 168.23  | 0.07  |
| 2,3',4,4',5,5'-Hexachlorobiphenyl        | PCB-167      | 52663-72-6 | C12H4Cl6 | 357.8444   | 338.8705              | 167.83  | 0.07  |
| 3,3',4,4',5,5'-Hexachlorobiphenyl        | PCB-169      | 32774-16-6 | C12H4Cl6 | 357.8444   | 338.8705              | 169.97  | 0.12  |
| 2,3,3',4,4',5,5'-Heptachlorobiphenyl     | PCB-189      | 39635-31-9 | C12H3Cl7 | 391.8054   | 372.8315              | 173.93  | 0.03  |
| 2,3,3',4,4',5,6-Heptachlorobiphenyl      | PCB-190      | 41411-64-7 | C12H3Cl7 | 391.8054   | 372.8315              | 173.33  | 0.07  |
| 2,3,3',4',5,5',6-Heptachlorobiphenyl     | PCB-193      | 69782-91-8 | C12H3Cl7 | 391.8054   | 372.8315              | 173.87  | 0.07  |
| 2,2',3,3',4,4',5,5'-Octachlorobiphenyl   | PCB-194      | 35694-08-7 | C12H2Cl8 | 425.7665   | 406.7925              | 180.33  | 0.03  |
| 2,2',3,3',4,4',5,6-Octachlorobiphenyl    | PCB-195      | 52663-78-2 | C12H2Cl8 | 425.7665   | 406.7925              | 178.03  | 0.03  |
| 2,2',3,3',5,5',6,6'-Octachlorobiphenyl   | PCB-202      | 2136-99-4  | C12H2Cl8 | 425.7665   | 406.7925              | 176.90  | 0.06  |
| 2,2',3,3',4,4',5,5',6-Nonachlorobiphenyl | PCB-206      | 40186-72-9 | C12H1Cl9 | 459.7275   | 440.7536              | 183.47  | 0.03  |
| 2,2',3,3',4,4',5,6,6'-Nonachlorobiphenyl | PCB-207      | 52663-79-3 | C12H1Cl9 | 459.7275   | 440.7536              | 181.70  | 0.11  |
| 2,2',3,3',4,5,5',6,6'-Nonachlorobiphenyl | PCB-208      | 52663-77-1 | C12H1Cl9 | 459.7275   | 440.7536              | 182.07  | 0.08  |
| Decachlorobiphenyl                       | PCB 209      | 2051-24-3  | C12Cl10  | 493.6800   | 474.7061              | 185.88  | 0.58  |

## OH-PCBs

| Compound                                           | Abbreviation  | CAS number  | Formula   | Exact Mass | [M-H] <sup>-</sup> | Avg CCS | RSD % |
|----------------------------------------------------|---------------|-------------|-----------|------------|--------------------|---------|-------|
| 4-Hydroxy-2-chlorobiphenyl                         | 4-OH-PCB-001  | 23719-22-4  | C12H9ClO  | 204.0342   | 203.0264           | 147.50  | 0.07  |
| 4-Hydroxy-3-chlorobiphenyl                         | 4-OH-PCB-002  | 92-04-6     | C12H9ClO  | 204.0342   | 203.0264           | 146.53  | 0.10  |
| 2-Hydroxy-5-chlorobiphenyl                         | 6-OH-PCB-002  | 607-12-5    | C12H9ClO  | 204.0342   | 203.0264           | 144.03  | 0.08  |
| 4-Hydroxy-4'-chlorobiphenyl                        | 4'-OH-PCB-003 | 28034-99-3  | C12H9ClO  | 204.0342   | 203.0264           | 148.3   | 0.38  |
| 2-Hydroxy-2',5'-dichlorobiphenyl                   | 2'-OH-PCB-009 | 53905-30-9  | C12H8Cl2O | 237.9952   | 236.9874           | 151.6   | 0.43  |
| 3-Hydroxy-2',5'-dichlorobiphenyl                   | 3'-OH-PCB-009 | 53905-29-6  | C12H8Cl2O | 237.9952   | 236.9874           | 155.4   | 0.04  |
| 4-Hydroxy-2',5'-dichlorobiphenyl                   | 4'-OH-PCB-009 | 53905-28-5  | C12H8Cl2O | 237.9952   | 236.9874           | 153.13  | 0.08  |
| 4-Hydroxy-3,5-dichlorobiphenyl                     | 4-OH-PCB-014  | 1137-59-3   | C12H8Cl2O | 237.9952   | 236.9874           | 151.5   | 0.10  |
| 4-Hydroxy-2,2',5'-trichlorobiphenyl                | 4'-OH-PCB-018 | 53905-33-2  | C12H7Cl3O | 271.9562   | 270.9484           | 158.9   | 0.06  |
| 4-Hydroxy-2',4',6'-trichlorobiphenyl               | 4'-OH-PCB-030 | 14962-28-8  | C12H7Cl3O | 271.9562   | 270.9484           | 159.83  | 0.04  |
| 4-Hydroxy-2,2',4',6'-tetrachlorobiphenyl           | 4'-OH-PCB-050 | 150304-08-8 | C12H6Cl4O | 305.9173   | 304.9095           | 163.2   | 0.04  |
| 4-Hydroxy-2',3',4',5'-tetrachlorobiphenyl          | 4'-OH-PCB-061 | 67651-34-7  | C12H6Cl4O | 305.9173   | 304.9095           | 163.67  | 0.04  |
| 4-Hydroxy-2',3',5',6'-tetrachlorobiphenyl          | 4'-OH-PCB-065 | 14962-32-4  | C12H6Cl4O | 305.9173   | 304.9095           | 163.97  | 0.19  |
| 2-Hydroxy-2',3',4',5,5'-pentachlorobiphenyl        | 6'-OH-PCB-106 | 67651-36-9  | C12H5Cl5O | 339.8783   | 338.8705           | 166.8   | 0.23  |
| 4-Hydroxy-2',3',3',4',5'-pentachlorobiphenyl       | 4'-OH-PCB-106 | 67651-35-8  | C12H5Cl5O | 339.8783   | 338.8705           | 170.0   | 0.09  |
| 4-Hydroxy-2',3,3',4',5,5'-hexachlorobiphenyl       | 4'-OH-PCB-159 | 158076-63-2 | C12H4Cl6O | 373.8393   | 372.8315           | 175.3   | 0.06  |
| 4-Hydroxy-2',3,3',3',4',5,5'-hexachlorobiphenyl    | 4'-OH-PCB-165 | N/A         | C12H4Cl6O | 373.8393   | 372.8315           | 175.70  | 0.10  |
| 5-Hydroxy-2,2',3,4,4',5,5'-heptachlorobiphenyl     | 5-OH-PCB-138  | N/A         | C12H3Cl7O | 373.8393   | 372.8315           | 174.6   | 0.03  |
| 4'-Hydroxy-2,2',3,3',4,4',5,5'-heptachlorobiphenyl | 4'-OH-PCB-172 | N/A         | C12H3Cl7O | 407.8004   | 406.7925           | 180.4   | 0.14  |
| 3'-Hydroxy-2,2',3,4,4',5,6'-heptachlorobiphenyl    | 3'-OH-PCB-182 | N/A         | C12H3Cl7O | 407.8004   | 406.7925           | 178.6   | 0.29  |

## Polybrominated diphenyl ethers (PBDEs)

| Compound                                      | Abbreviation | CAS number  | Formula   | Exact Mass | [M-Br+O] <sup>-</sup> | Avg CCS | RSD % |
|-----------------------------------------------|--------------|-------------|-----------|------------|-----------------------|---------|-------|
| 2,2',4-Tribromodiphenyl ether                 | PBDE-017     | 147217-75-2 | C12H7Br3O | 403.8047   | 340.8813              | 160.63  | 0.07  |
| 2,2',4,4'-Tetrabromodiphenyl ether            | PBDE-047     | 5436-43-1   | C12H6Br4O | 481.7152   | 418.7918              | 169.73  | 0.03  |
| 2,3',4,4'-Tetrabromodiphenyl ether            | PBDE-066     | 189084-61-5 | C12H6Br4O | 481.7152   | 418.7918              | 170.30  | 0.10  |
| 3,3',4,4'-Tetrabromodiphenyl ether            | PBDE-077     | 93703-48-1  | C12H6Br4O | 481.7152   | 418.7918              | 172.07  | 0.03  |
| 2,2',3,4,4'-Pentabromodiphenyl ether          | PBDE-085     | 182346-21-0 | C12H5Br5O | 559.6257   | 496.7023              | 176.97  | 0.07  |
| 2,2',4,4',6-Pentabromodiphenyl ether          | PBDE 100     | 189084-64-8 | C12H5Br5O | 559.6257   | 496.7023              | 175.37  | 0.03  |
| 2,3,4,5,6-Pentabromodiphenyl ether            | PBDE-116     | 189084-65-9 | C12H5Br5O | 559.6257   | 496.7023              | 172.00  | 0.00  |
| 2,2',3,3',4,4'-Hexabromodiphenyl ether        | PBDE-128     | 182677-28-7 | C12H4Br6O | 637.5362   | 574.6128              | 184.57  | 0.08  |
| 2,2',3,4,4',5'-Hexabromodiphenyl ether        | PBDE-138     | 182677-30-1 | C12H4Br6O | 637.5362   | 574.6128              | 184.87  | 0.08  |
| 2,2',4,4',5,5'-Hexabromodiphenyl ether        | PBDE-153     | 68631-49-2  | C12H4Br6O | 637.5362   | 574.6128              | 183.53  | 0.11  |
| 2,2',4,4',5,6'-Hexabromodiphenyl ether        | PBDE 154     | 207122-15-4 | C12H4Br6O | 637.5362   | 574.6128              | 183.57  | 0.11  |
| 2,2',3,4,4',5'-Heptabromodiphenyl ether       | PBDE-183     | 207122-16-5 | C12H3Br7O | 715.4467   | 652.523321            | 189.87  | 0.19  |
| 2,3,3',4,4',5,6-Heptabromodiphenyl ether      | PBDE-190     | 189084-68-2 | C12H3Br7O | 715.4467   | 652.5233              | 191.03  | 0.03  |
| 2,2',3,4,4',5,5',6-Octabromodiphenyl ether    | PBDE-203     | 337513-72-1 | C12H2Br8O | 793.3573   | 730.4338              | 195.70  | 0.05  |
| 2,2',3,3',4,4',5,5',6-Nonabromodiphenyl ether | PBDE-206     | 63387-28-0  | C12H1Br9O | 871.2678   | 808.3443              | 202.77  | 0.06  |
| Decabromodiphenyl ether                       | PBDE-209     | 1163-19-5   | C12Br10O  | 949.1783   | 886.2549              | 205.23  | 0.20  |

## OH-PBDEs

| Compound                                        | Abbreviation  | CAS number | Formula    | Exact Mass | [M-H] <sup>-</sup> | Avg CCS | RSD % |
|-------------------------------------------------|---------------|------------|------------|------------|--------------------|---------|-------|
| 2'-Hydroxy-4-monobromodiphenyl ether            | 2'-OH-BDE-003 | N/A        | C12H9BrO2  | 263.9786   | 262.9708           | 152.97  | 0.10  |
| 3'-Hydroxy-2,4-dibromodiphenyl ether            | 3'-OH-BDE-007 | N/A        | C12H8Br2O2 | 341.8891   | 340.8813           | 164.60  | 0.16  |
| 4'-Hydroxy-2,2',4-tribromodiphenyl ether        | 4'-OH-BDE-017 | N/A        | C12H7Br3O2 | 419.7996   | 418.7917           | 169.87  | 0.12  |
| 2'-Hydroxy-2,4,4'-tribromodiphenyl ether        | 2'-OH-BDE-028 | N/A        | C12H7Br3O2 | 419.7996   | 418.7917           | 169.13  | 0.03  |
| 4-Hydroxy-2,2',3,4'-tetrabromodiphenyl ether    | 4-OH-BDE-042  | N/A        | C12H6Br4O2 | 497.7101   | 496.7022           | 176.90  | 0.10  |
| 3-Hydroxy-2,2',4,4'-tetrabromodiphenyl ether    | 3-OH-BDE-047  | N/A        | C12H6Br4O2 | 497.7101   | 496.7022           | 177.23  | 0.09  |
| 5-Hydroxy-2,2',4,4'-tetrabromodiphenyl ether    | 5-OH-BDE-047  | N/A        | C12H6Br4O2 | 497.7101   | 496.7022           | 177.53  | 0.12  |
| 6-Hydroxy-2,2',4,4'-tetrabromodiphenyl ether    | 6-OH-BDE-047  | N/A        | C12H6Br4O2 | 497.7101   | 496.7022           | 175.53  | 0.31  |
| 2'-Hydroxy-2,3',4,5'-tetrabromodiphenyl ether   | 2'-OH-BDE-068 | N/A        | C12H6Br4O2 | 497.7101   | 496.7022           | 176.07  | 0.14  |
| 6-Hydroxy-2,2',3,4,4'-pentabromodiphenyl ether  | 6-OH-BDE-085  | N/A        | C12H5Br5O2 | 575.6206   | 574.6127           | 183.53  | 0.08  |
| 5'-Hydroxy-2,2',4,4',5-pentabromodiphenyl ether | 5'-OH-BDE-099 | N/A        | C12H5Br5O2 | 575.6206   | 574.6127           | 184.30  | 0.39  |
| 6'-Hydroxy-2,2',4,4',5-pentabromodiphenyl ether | 6'-OH-BDE-099 | N/A        | C12H5Br5O2 | 575.6206   | 574.6127           | 183.27  | 0.06  |
| 3-Hydroxy-2,2',4,4',6-pentabromodiphenyl ether  | 3-OH-BDE-100  | N/A        | C12H5Br5O2 | 575.6206   | 574.6127           | 181.73  | 0.06  |
| 4'-Hydroxy-2,2',4,4',5-pentabromodiphenyl ether | 4'-OH-BDE-101 | N/A        | C12H5Br5O2 | 575.6206   | 574.6127           | 185.40  | 0.25  |
