# Supplementary material
Source: PubMed Central journal article supplement (PMC6223027)
Supplement: NIHMS990618-supplement-Supplemental_Info.pdf [file NIHMS990618-supplement-Supplemental_Info.pdf]

## **Supporting Information:**

### **Utilizing Ion Mobility Spectrometry and Mass Spectrometry for the Analysis of Polycyclic Aromatic Hydrocarbons, Polychlorinated Biphenyls, Polybrominated Diphenyl Ethers and Their Metabolites**

Xueyun Zheng, Kevin T. Dupuis, Noor A. Aly, Yuxuan Zhou, Francesca B. Smith, Keqi Tang, Richard D. Smith and Erin S. Baker\*

Biological Sciences Division, Pacific Northwest National Laboratory, Richland, WA 99354

Corresponding authors: Erin S. Baker

Address: 902 Battelle Blvd.  
P.O. Box 999, MSIN K8-98  
Richland, WA 99352  
Phone: 509-371-6219  
Email: erin.baker@pnnl.gov

**Keywords:** ion mobility spectrometry, collision cross section, xenobiotics, polycyclic aromatic hydrocarbons, polychlorinated biphenyls, polybrominated diphenyl ethers, electrospray ionization, atmospheric pressure chemical ionization, atmospheric pressure photoionization

**Table 1. The DTIMS CCS database generated from this work are in the attached excel Table S1. Chemical information, mass, and CCS values measured for each molecule with relative standard deviation are included.**

Instrument settings for direct measurement of DTIMS CCS are listed in Table S2-S4:

**Table S2. Front Funnel Settings for the 1700m/z\_250 Stable Ions Mode**

| High Pressure funnel delta (V) | High Pressure Funnel RF (V) | Trap funnel delta (V) | Trap funnel RF (V) | Trap Funnel Exit (V) |
|--------------------------------|-----------------------------|-----------------------|--------------------|----------------------|
| 150                            | 100                         | 180                   | 100                | 10                   |

**Table S3. Drift Tube Settings for Stepped Field Experiments in Positive Mode**

| Time Sequence | Time (min) | Drift Tube Entrance (V) | Drift Tube Exit (V) | Rear Funnel Entrance (V) | Rear Funnel Exit (V) |
|---------------|------------|-------------------------|---------------------|--------------------------|----------------------|
| 1             | 0.0 – 0.5  | 1074                    | 224                 | 217.5                    | 45                   |
| 2             | 0.5 – 1.0  | 1174                    | 224                 | 217.5                    | 45                   |
| 3             | 1.0 – 1.5  | 1274                    | 224                 | 217.5                    | 45                   |
| 4             | 1.5 – 2.0  | 1374                    | 224                 | 217.5                    | 45                   |
| 5             | 2.0 – 2.5  | 1474                    | 224                 | 217.5                    | 45                   |
| 6             | 2.5 – 3.0  | 1574                    | 224                 | 217.5                    | 45                   |
| 7             | 3.0 – 3.5  | 1674                    | 224                 | 217.5                    | 45                   |

**Table S4. Drift Tube Settings for Stepped Field Experiments in Negative Mode**

| Time Sequence | Time (min) | Drift Tube Entrance (V) | Drift Tube Exit (V) | Rear Funnel Entrance (V) | Rear Funnel Exit (V) |
|---------------|------------|-------------------------|---------------------|--------------------------|----------------------|
| 1             | 0.0 – 0.5  | -1074                   | -224                | -217.5                   | -45                  |
| 2             | 0.5 – 1.0  | -1174                   | -224                | -217.5                   | -45                  |
| 3             | 1.0 – 1.5  | -1274                   | -224                | -217.5                   | -45                  |
| 4             | 1.5 – 2.0  | -1374                   | -224                | -217.5                   | -45                  |
| 5             | 2.0 – 2.5  | -1474                   | -224                | -217.5                   | -45                  |
| 6             | 2.5 – 3.0  | -1574                   | -224                | -217.5                   | -45                  |
| 7             | 3.0 – 3.5  | -1674                   | -224                | -217.5                   | -45                  |
